# Supplementary material
Source: MDPI journal article supplement (https://www.mdpi.com/2073-4344/13/5/872)
Supplement: s1 [file s1]

Communication

# Magnetically separable mixed-phase $\alpha/\gamma$ -Fe<sub>2</sub>O<sub>3</sub> catalyst for photo-Fenton-like oxidation of Rhodamine B

Asiyat Magomedova <sup>1</sup>, Abdulgalim Isaev <sup>1,\*</sup>, Farid Orudzhev <sup>1</sup>, Dinara Sobola <sup>1,2,3</sup>, Rabadanov Murtazali <sup>1</sup>, Alina Rabadanova <sup>1</sup>, Nabi S. Shabanov <sup>4</sup>, Mingshan Zhu <sup>5</sup>, Ruslan Emirov <sup>1</sup>, Sultanakhmed Gadzhimagomedov <sup>1</sup>, Nariman Alikhanov <sup>1</sup> and Kaviyarasu Kasinathan <sup>6,7</sup>

<sup>1</sup> Department of Inorganic Chemistry and Chemical Ecology, Dagestan State University, st. M. Gadjieva 43-a, 367015 Makhachkala, Russia; asiyat\_magomedova1996@mail.ru (A.M.); farid-stkha@mail.ru (F.O.); sobola@vut.cz (D.S.); rab\_mur@mail.ru (M.R.); rabadanova.alinka@mail.ru (A.R.); shabanov.nabi@yandex.ru (N.S.); aderron@mail.ru (R.E.); darkusch@mail.ru (S.G.); alihanov.nariman@mail.ru (N.A.)

<sup>2</sup> Department of Physics, Faculty of Electrical Engineering and Communication, Brno University of Technology, Technická 2848/8, 61600 Brno, Czech Republic

<sup>3</sup> Central European Institute of Technology BUT, Purkyňova 123, 61200 Brno, Czech Republic

<sup>4</sup> Dagestan Federal Research Centre of the Russian Academy of Sciences, Analytical Center for Collective Use, M. Gadjieva 45, 367001 Makhachkala, Russia

<sup>5</sup> School of Environment, Jinan University, Guangzhou 511443, China; zhumingshan@jnu.edu.cn

<sup>6</sup> UNESCO-UNISA Africa Chair in Nanoscience's/Nanotechnology Laboratories, College of Graduate Studies, University of South Africa (UNISA), Muckleneuk Ridge, Pretoria, P.O. Box 392, South Africa; kasinathankaviyarasu@gmail.com

<sup>7</sup> Nanosciences African Network (NANOAFNET), Materials Research Group (MRG), iThemba LABS-National Research Foundation (NRF), 1 Old Faure Road Western Cape Province, P.O. Box 722, Somerset West 7129, South Africa

\* Correspondence: abdul-77@yandex.ru; Tel.: +7-963-427-97-78

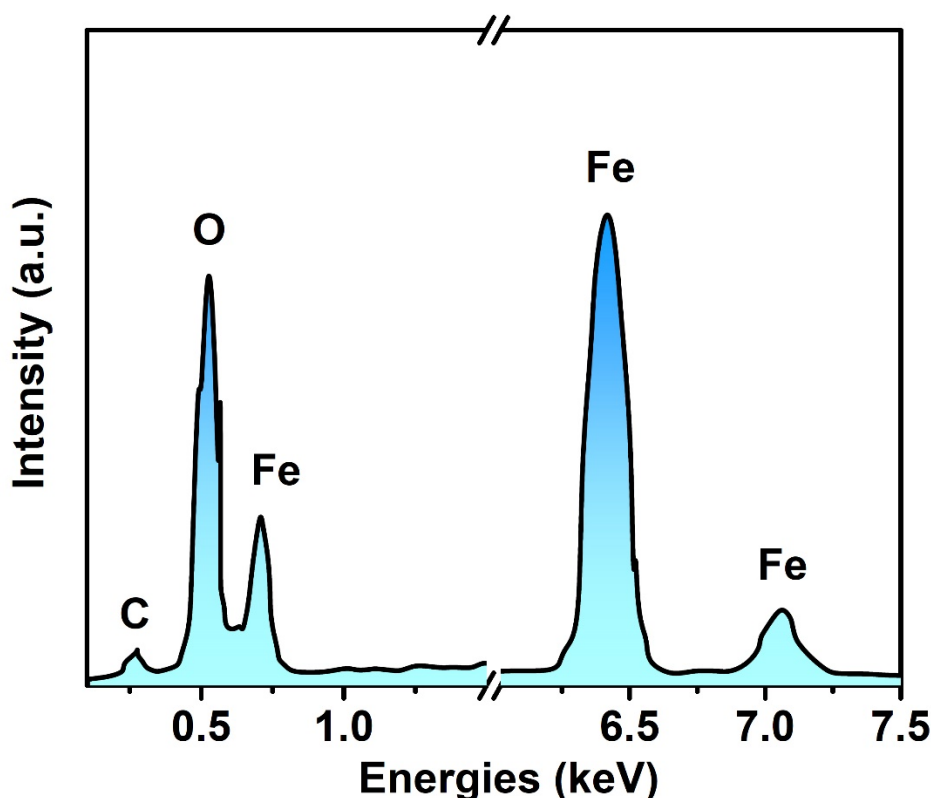

Figure S1. EDX spectra of  $\alpha/\gamma$ -Fe<sub>2</sub>O<sub>3</sub>.

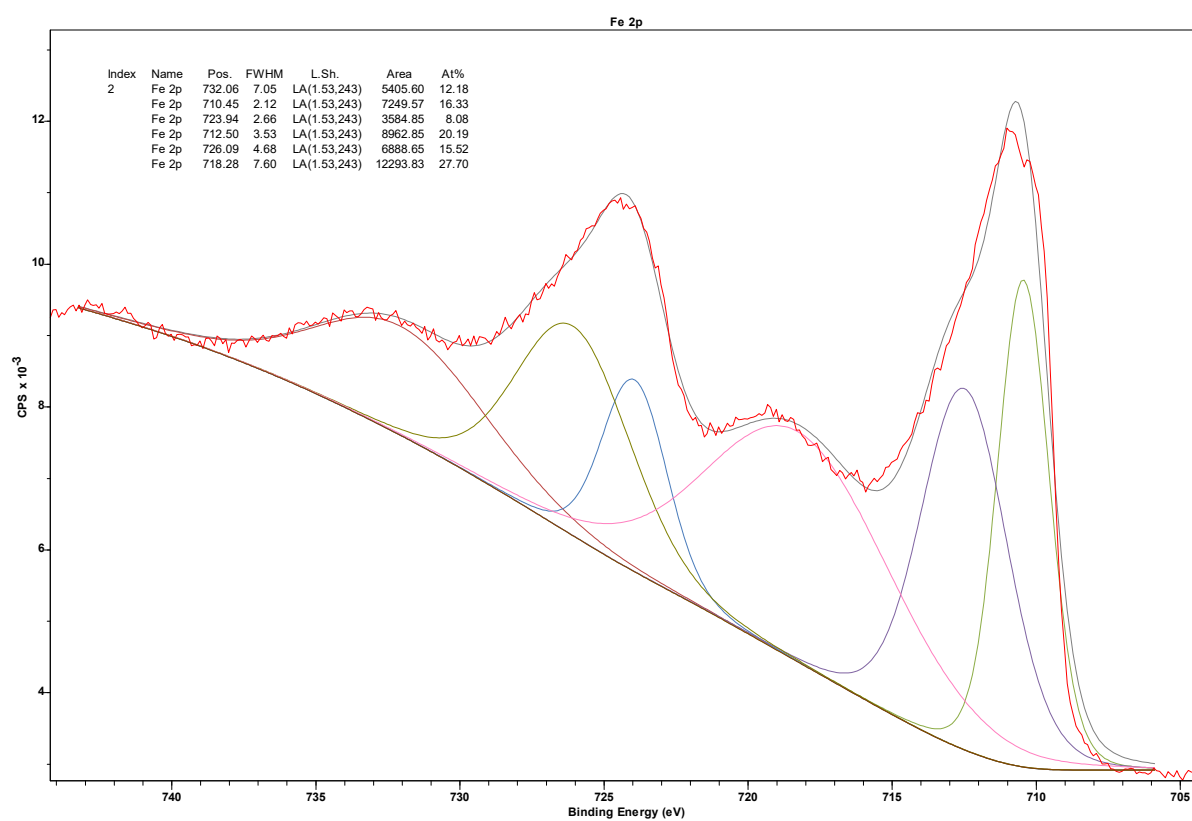

Figure S2. Fe 2p level XPS spectra.

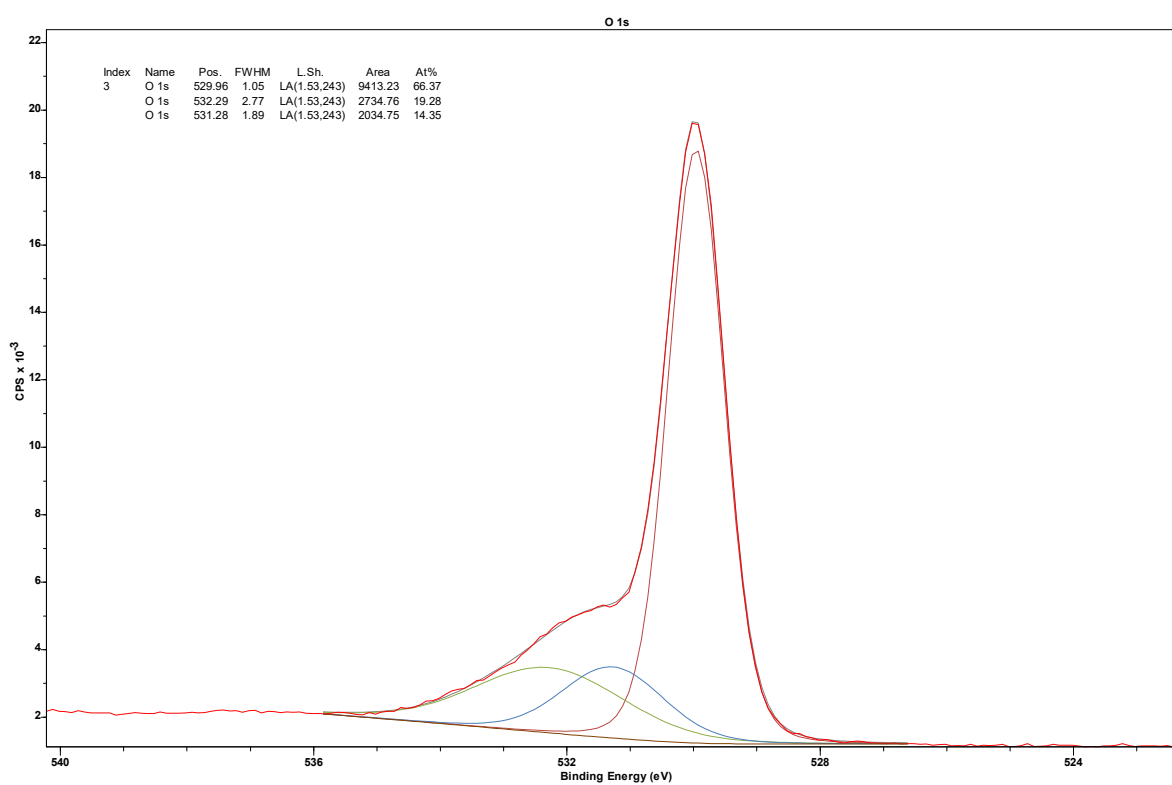

Figure S3. O1s level XPS spectra.

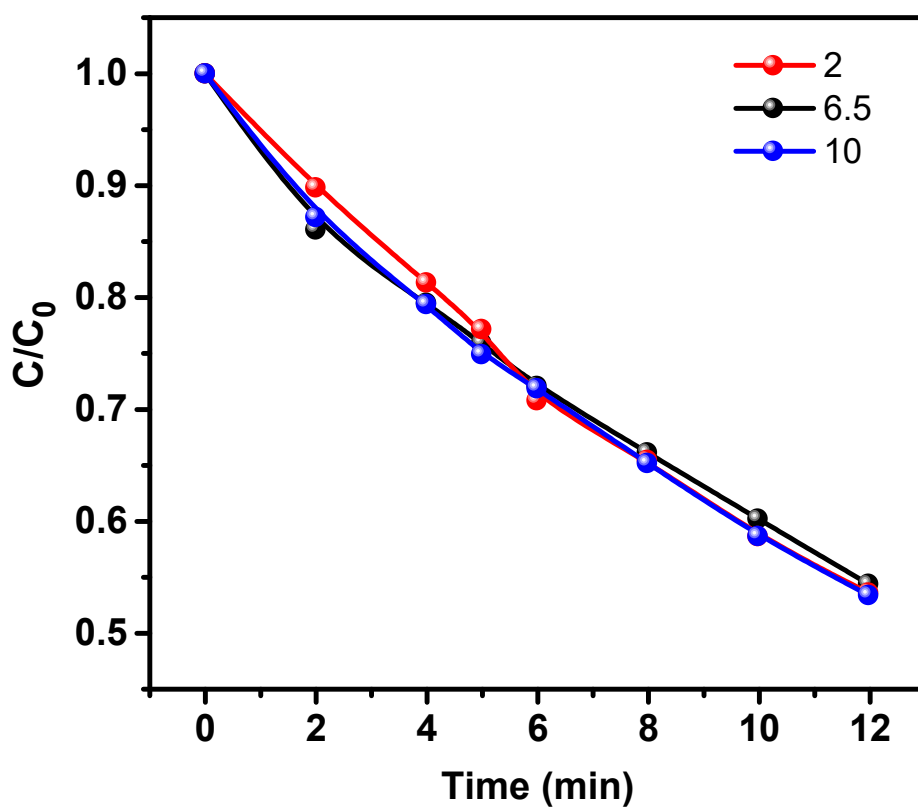

Figure S4. Dependence of the catalytic activity of the photo-Fenton-like process on pH ( $C_{RhB} = 8$  mg/l;  $C(H_2O_2) = 0.18$  mM;  $t = 12$  min)
